# Supplementary material
Source: PubMed Central journal article supplement (PMC3950327)

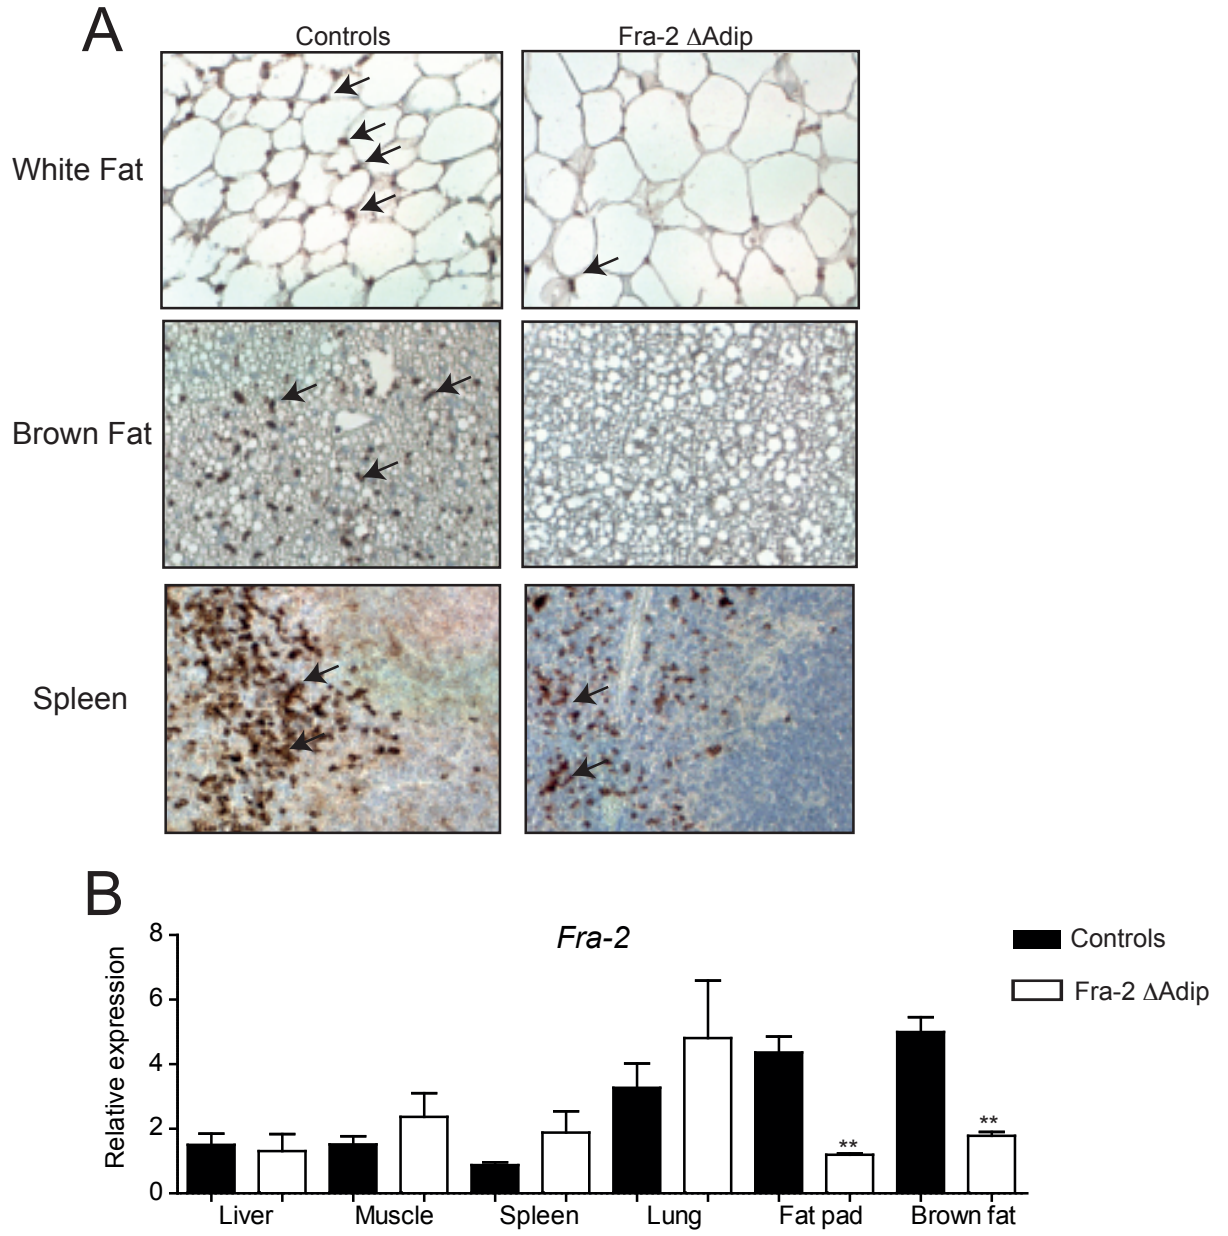

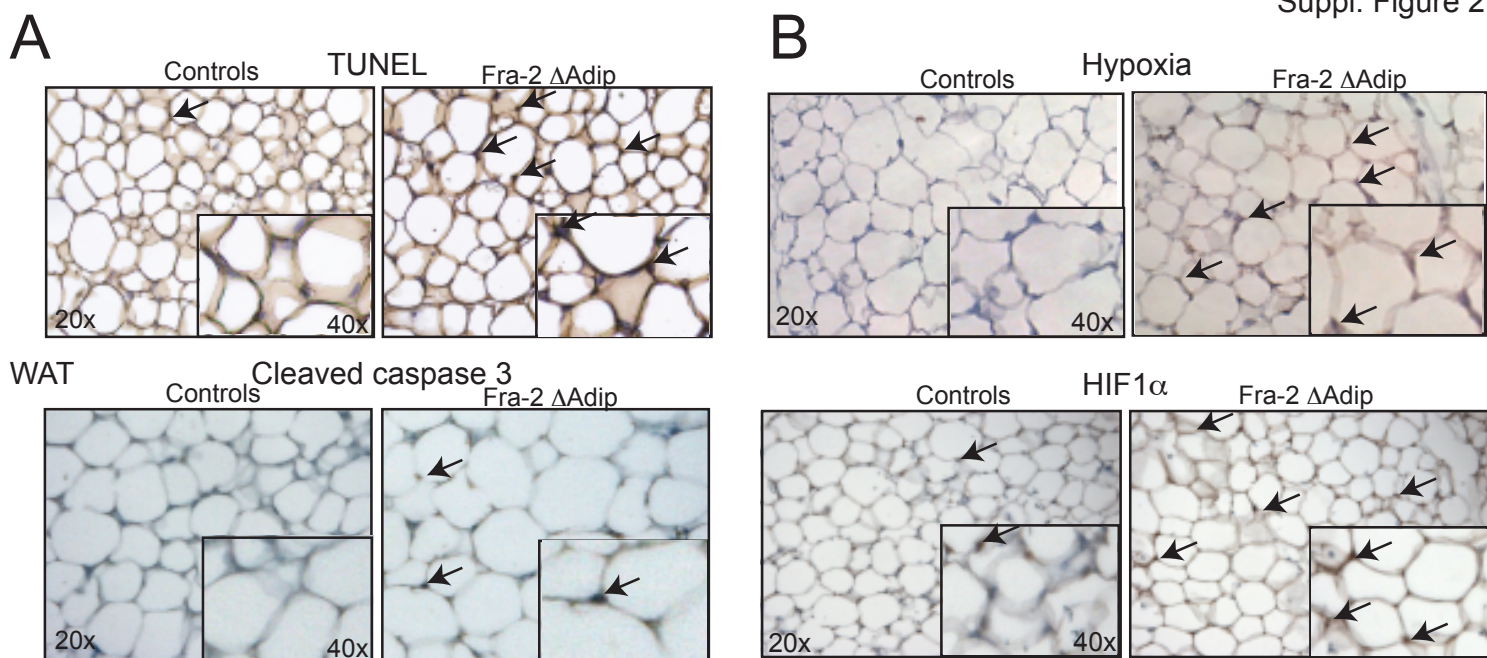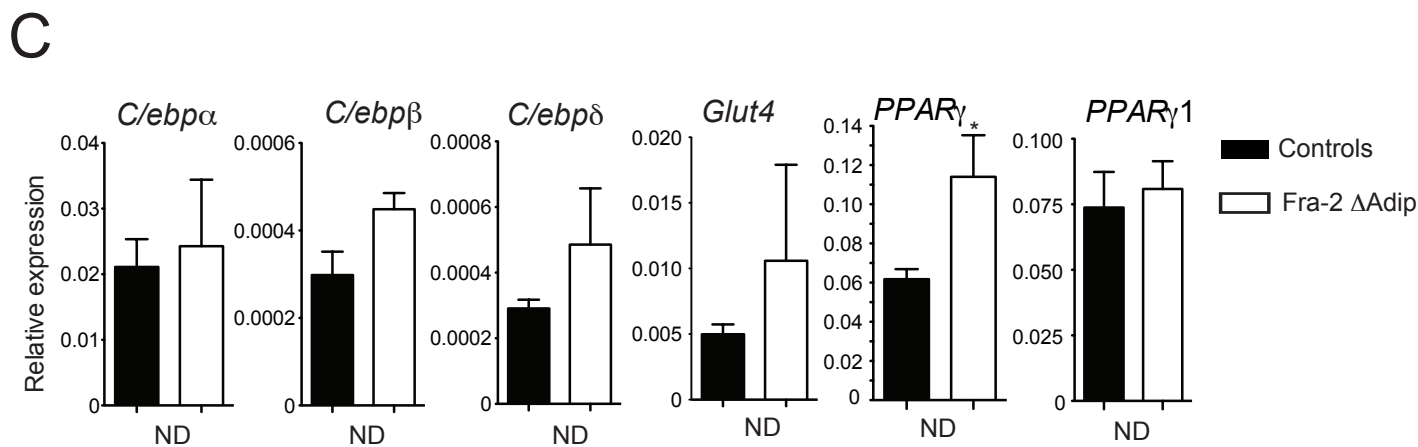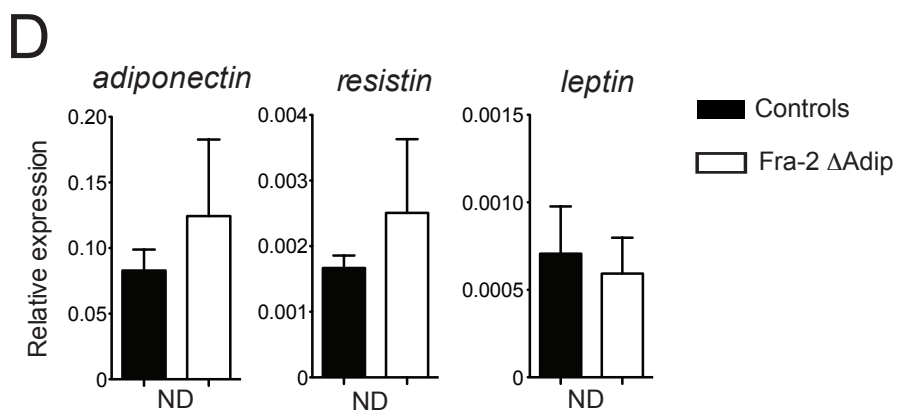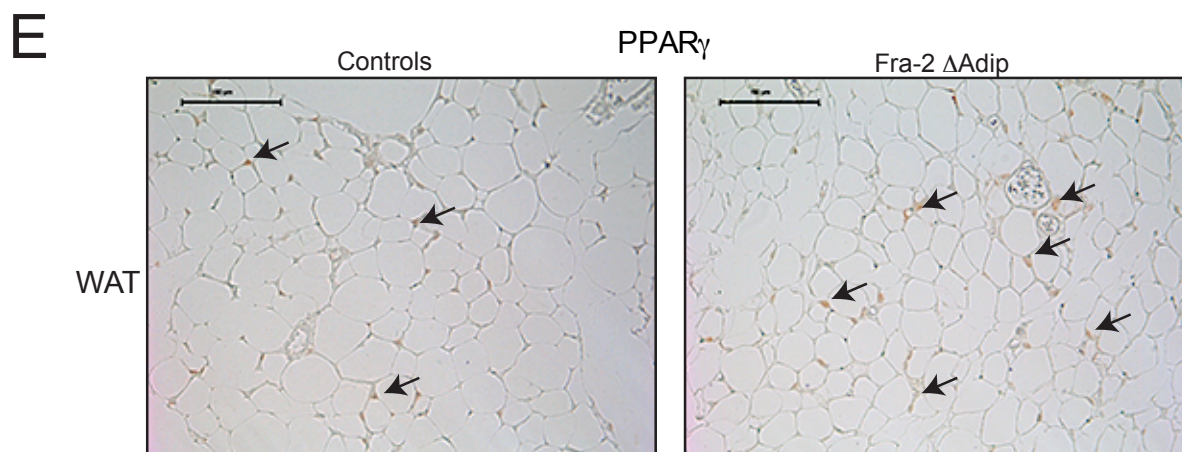

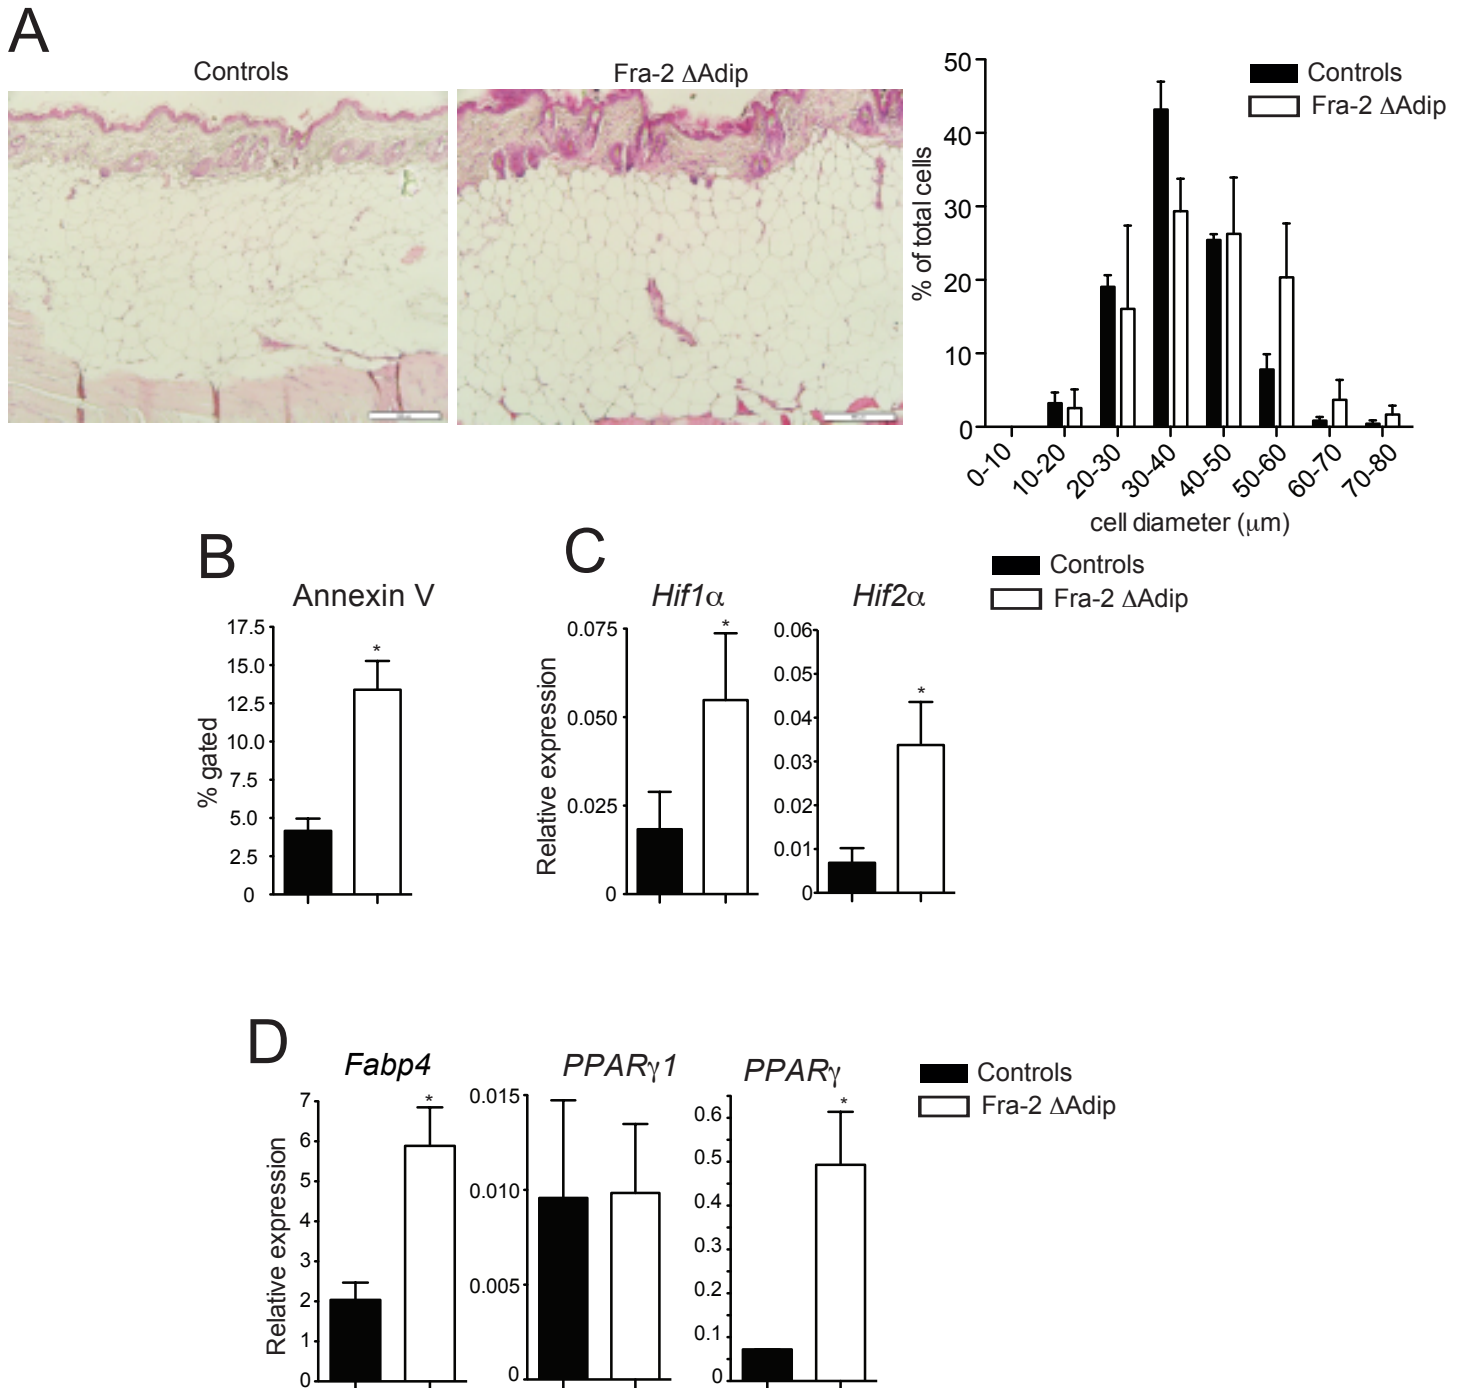

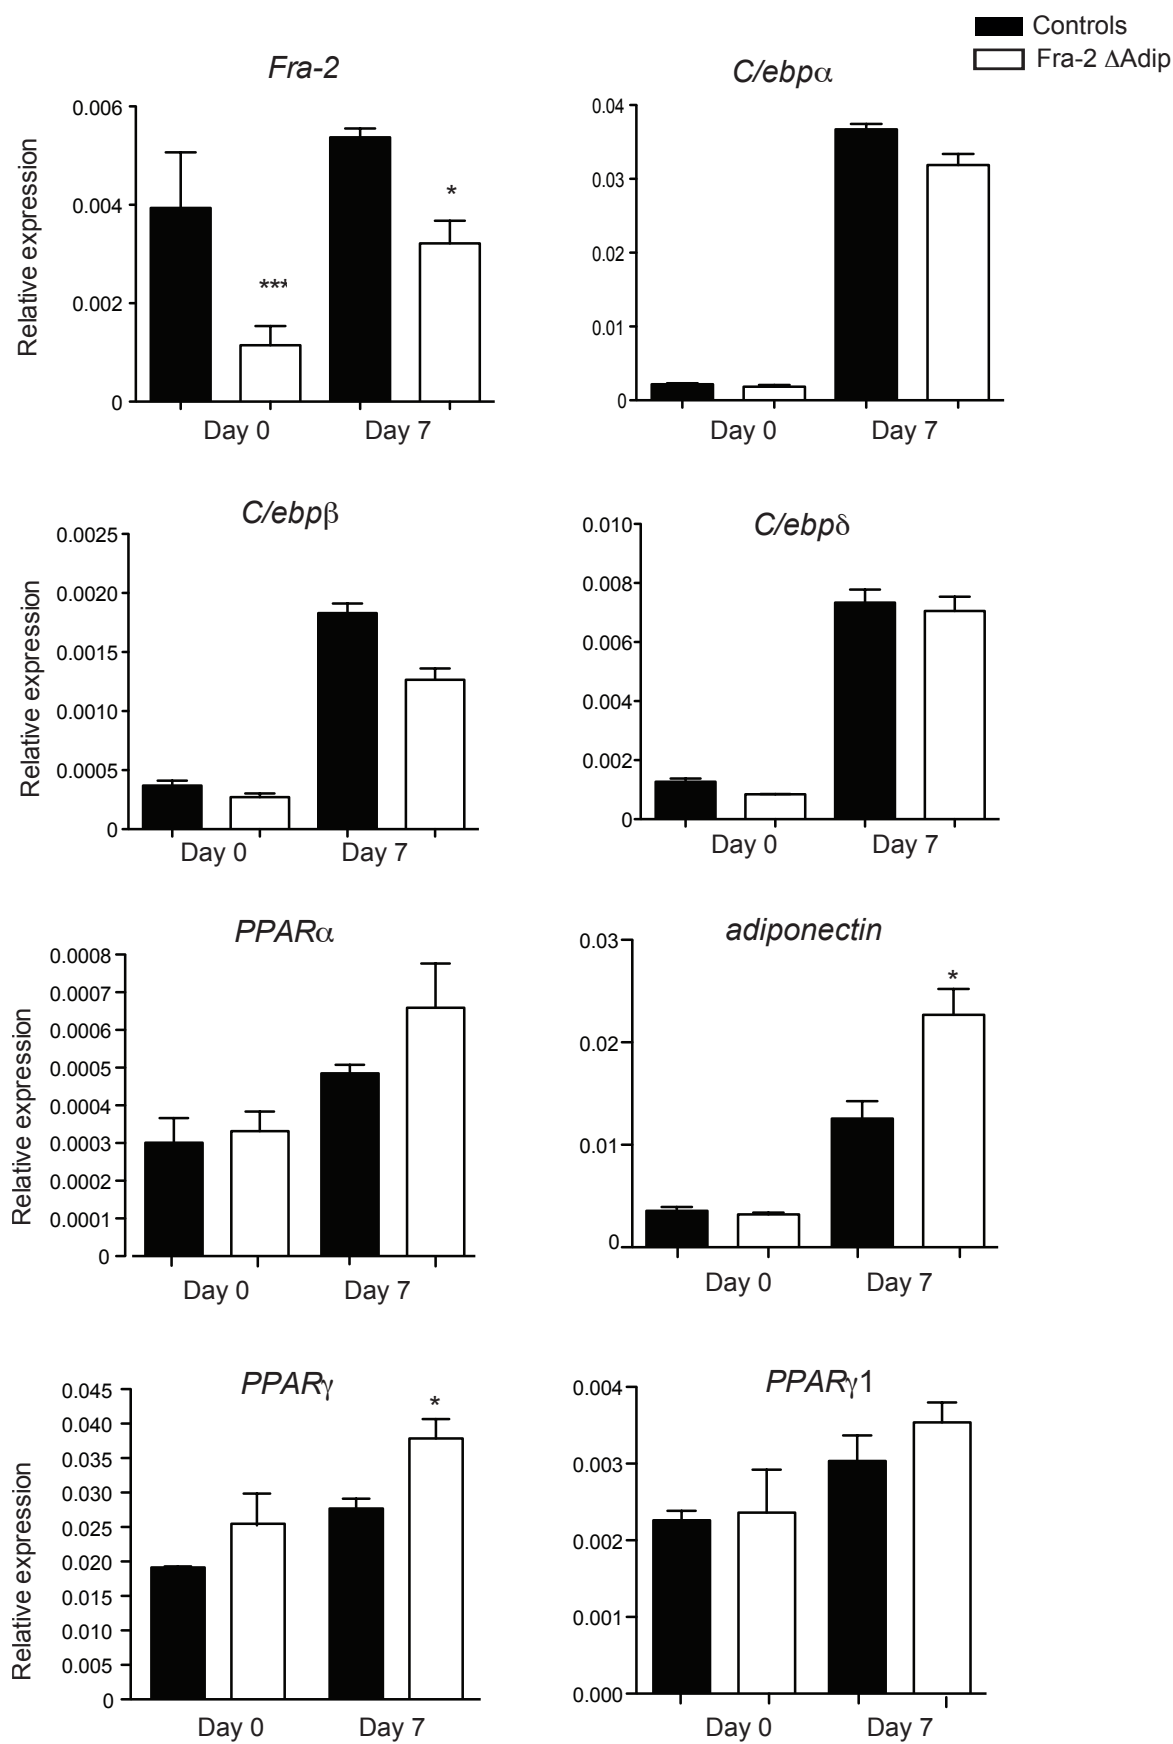

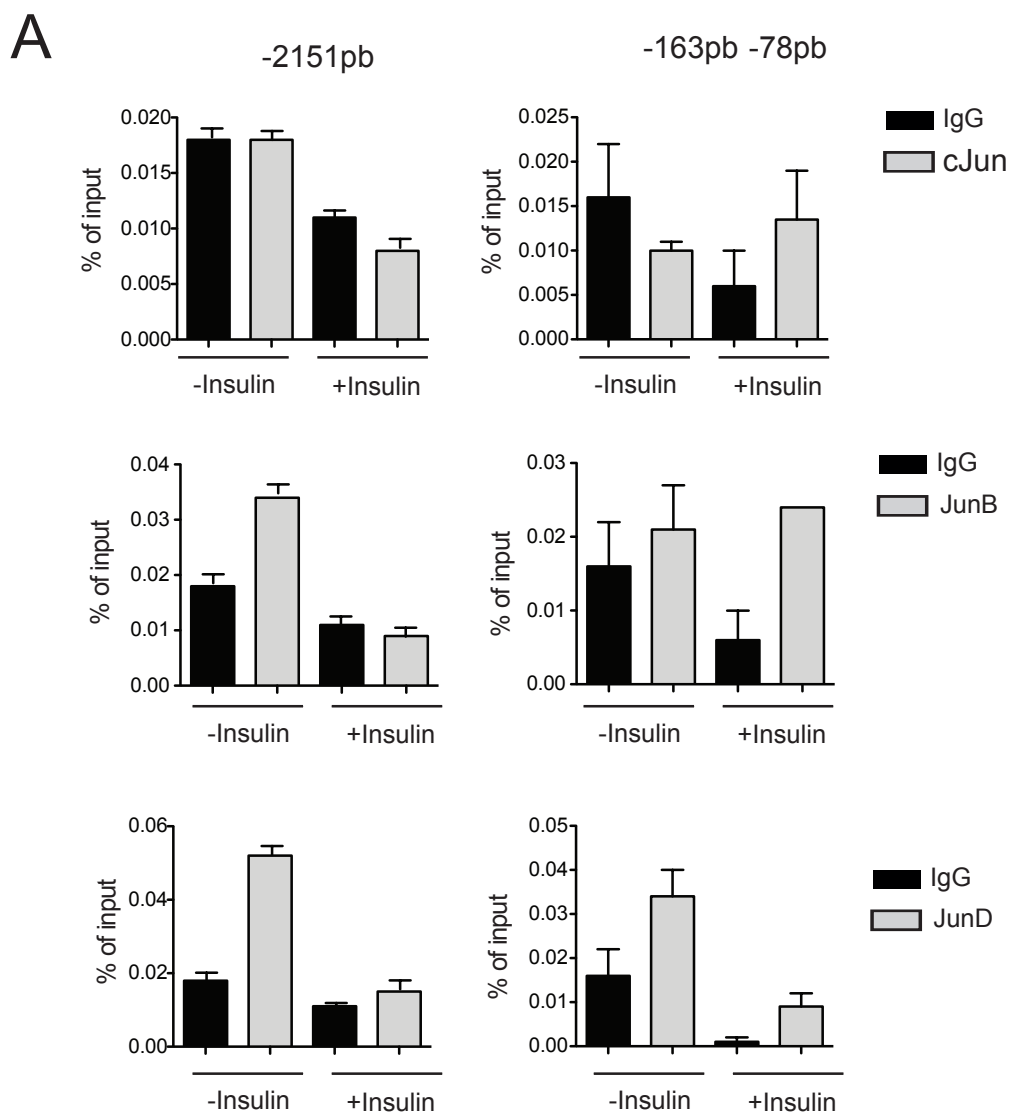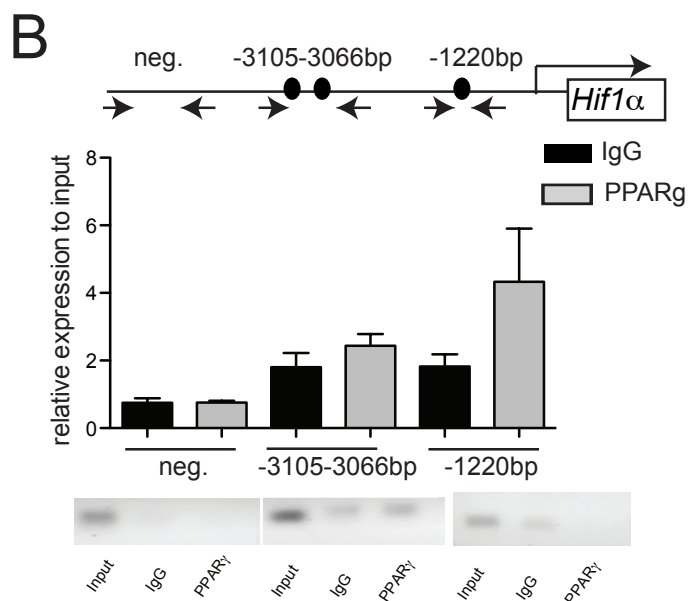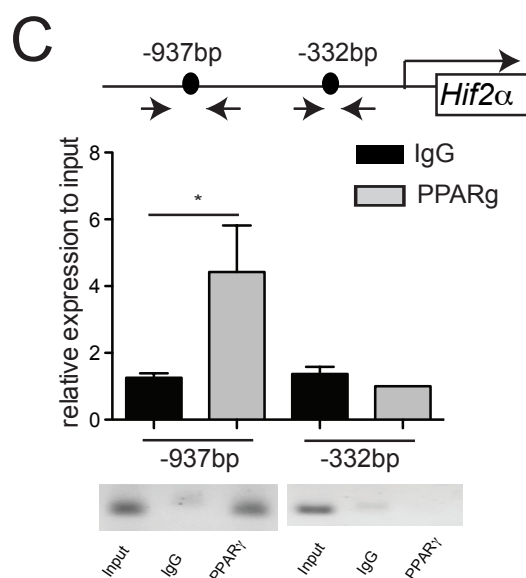

Suppl. Figure 6

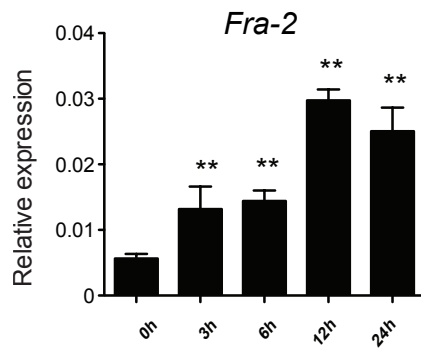

Supplement: cdd2013198x1.pdf [file cdd2013198x1.pdf]
